# Supplementary material for: Myopia is associated with education: Results from NHANES 1999-2008
Source: PLOS journal article supplement (doi:10.1371/journal.pone.0211196), 2019-01-29
Supplement: S4 (10.1371/journal.pone.0211196.s004) [file journal.pone.0211196.s004]

**S4 Table. The association of myopia ( $\leq -0.75$  D) with education in separate models in the NHANES 1999 – 2008, with additional adjustment.**

| Education                          | Adjusted model <sup>a</sup><br>(n= 19,704) |          | Adjusted model <sup>b1</sup><br>(n=18,232) |          | Adjusted model <sup>b2</sup><br>(n= 14,651) |          |
|------------------------------------|--------------------------------------------|----------|--------------------------------------------|----------|---------------------------------------------|----------|
|                                    | Odds ratio [95% confidence interval]       | P value  | Odds ratio [95% confidence interval]       | P value  | Odds ratio [95% confidence interval]        | P value  |
| Less Than 9th Grade                | Reference                                  | -        | Reference                                  | -        | Reference                                   | -        |
| 9-11th Grade                       | 1.26 [1.01; 1.57]                          | 0.05     | 1.29 [1.02; 1.63]                          | 0.04     | 1.22 [0.97; 1.54]                           | 0.09     |
| High School Grad/GED or Equivalent | 1.63 [1.34; 1.97]                          | 5.46e-06 | 1.61 [1.32; 1.95]                          | 1.52e-05 | 1.61 [1.31; 1.97]                           | 4.12e-05 |
| Some College or AA degree          | 2.23 [1.83; 2.72]                          | 7.19e-11 | 2.15 [1.75; 2.64]                          | 7.99e-10 | 2.20 [1.78; 2.73]                           | 4.05e-09 |
| College Graduate or above          | 3.60 [2.95; 4.40]                          | < 2e-16  | 3.27 [2.64; 4.07]                          | 1.65e-15 | 3.48 [2.81; 4.30]                           | 4.82e-15 |

All models calculated with consideration of the study sample structure; <sup>a</sup> results from the multivariable linear regression model adjusted for age, sex, survey cycle, corneal power, ethnicity; <sup>b1</sup> additionally adjusted for poverty-to-income ratio; <sup>b2</sup> additionally adjusted for vitamin d level as a proxy for outdoor activity; AA: Associate of Arts degree, undergraduate academic degree awarded by colleges usually after completion of a two-year course; GED: General Education Development or Diploma, certification that provides that the test taker has United States or Canadian high-school-level academic skills.
