# Supplementary material for: Myopia is associated with education: Results from NHANES 1999-2008
Source: PLOS journal article supplement (doi:10.1371/journal.pone.0211196), 2019-01-29
Supplement: S6 (10.1371/journal.pone.0211196.s006) [file journal.pone.0211196.s006]

**S6 Table. Sensitivity analysis: The association of myopia ( $\leq -0.75$  D) with education in separate models in the NHANES 1999 – 2008, restricted to participants aged 30 years and older.**

| Education                          | Crude analysis (n= 15,620)           |          | Adjusted model <sup>a</sup> (n=15,620) |          | Adjusted model <sup>b</sup> (n=15,578) |          |
|------------------------------------|--------------------------------------|----------|----------------------------------------|----------|----------------------------------------|----------|
|                                    | Odds ratio [95% confidence interval] | P value  | Odds ratio [95% confidence interval]   | P value  | Odds ratio [95% confidence interval]   | P value  |
| Less Than 9th Grade                | Reference                            | -        | Reference                              | -        | Reference                              | -        |
| 9-11th Grade                       | 1.49 [1.19; 1.87]                    | 0.001    | 1.36 [1.08; 1.70]                      | 0.01     | 1.38 [1.09; 1.76]                      | 0.01     |
| High School Grad/GED or Equivalent | 2.08 [1.71; 2.54]                    | 3.36e-10 | 1.92 [1.58; 2.34]                      | 1.35e-08 | 1.92 [1.56; 2.36]                      | 6.30e-08 |
| Some College or AA degree          | 2.91 [2.35; 3.61]                    | 9.44e-15 | 2.56 [2.06; 3.18]                      | 3.59e-12 | 2.59 [2.06; 3.25]                      | 1.42e-11 |
| College Graduate or above          | 4.48 [3.62; 5.54]                    | < 2e-16  | 4.01 [3.24; 4.96]                      | < 2e-16  | 4.13 [3.30; 5.16]                      | < 2e-16  |

All models calculated with consideration of the study sample structure; <sup>a</sup> results from the multivariable logistic regression models adjusted for age, sex, survey cycle; <sup>b</sup> additionally adjusted for corneal power; AA: Associate of Arts degree, undergraduate academic degree awarded by colleges usually after completion of a two-year course; GED: General Education Development or Diploma, certification that provides that the test taker has United States or Canadian high-school-level academic skills.
